# Supplementary material for: Dynamic Adsorption of As(V) onto the Porous α-Fe2O3/Fe3O4/C Composite Prepared with Bamboo Bio-Template
Source: MDPI journal article supplement (doi:10.3390/w14121848), 2022-06-08
Supplement: s1 [file s1]

## Supplementary Materials

# Dynamic Adsorption of As(V) onto the Porous $\alpha$ -Fe<sub>2</sub>O<sub>3</sub>/Fe<sub>3</sub>O<sub>4</sub>/C Composite Prepared with Bamboo Bio-template

Yuqing Peng, Yanhong Li\*, Shen Tang, Lihao Zhang, Jing Zhang, Yao Zhao, Xuehong Zhang, and Yinian Zhu

\* Correspondence: lyh1685@163.com

**Table S1.** Parameters of the Thomas model and the equilibrium As(V) uptake ( $q_e$ ) and the total removal percentage (Y) for As(V) adsorption onto PC-Fe/C-B under different conditions.

| $C_0$<br>mg/L | Q<br>mL/min  | Dosage<br>m<br>g | Particle<br>size<br>mesh | T<br>°C   | pH       | $k_{Th}$<br>mL/min·mg | $q_{e,cal}$<br>mg/g | $q_{e,exp}$<br>mg/g | Y<br>%       | $R^2$         |
|---------------|--------------|------------------|--------------------------|-----------|----------|-----------------------|---------------------|---------------------|--------------|---------------|
| 10            | 5.136        | 0.5              | <100                     | 35        | 3        | 0.00616               | 13.42               | 13.29               | 78.43        | 0.9877        |
| <b>20</b>     | <b>5.136</b> | <b>0.5</b>       | <b>&lt;100</b>           | <b>35</b> | <b>3</b> | <b>0.00419</b>        | <b>18.65</b>        | <b>18.3</b>         | <b>71.27</b> | <b>0.9897</b> |
| 30            | 5.136        | 0.5              | <100                     | 35        | 3        | 0.00306               | 20.27               | 19.41               | 66.33        | 0.9587        |
| 20            | 4.28         | 0.5              | <100                     | 35        | 3        | 0.00334               | 19.64               | 19.15               | 72.18        | 0.9871        |
| <b>20</b>     | <b>5.136</b> | <b>0.5</b>       | <b>&lt;100</b>           | <b>35</b> | <b>3</b> | <b>0.00419</b>        | <b>18.65</b>        | <b>18.3</b>         | <b>71.27</b> | <b>0.9897</b> |
| 20            | 6.849        | 0.5              | <100                     | 35        | 3        | 0.00459               | 21.61               | 21                  | 73           | 0.9779        |
| 20            | 8.561        | 0.5              | <100                     | 35        | 3        | 0.00469               | 20.8                | 19.34               | 59.45        | 0.9368        |
| 20            | 5.136        | 0.3              | <100                     | 35        | 3        | 0.00669               | 17.5                | 16.88               | 65.72        | 0.9801        |
| 20            | 5.136        | 0.4              | <100                     | 35        | 3        | 0.00494               | 20.54               | 20.19               | 74.86        | 0.992         |
| <b>20</b>     | <b>5.136</b> | <b>0.5</b>       | <b>&lt;100</b>           | <b>35</b> | <b>3</b> | <b>0.00419</b>        | <b>18.65</b>        | <b>18.3</b>         | <b>71.27</b> | <b>0.9897</b> |
| 20            | 5.136        | 0.6              | <100                     | 35        | 3        | 0.00327               | 19.71               | 19.22               | 72.44        | 0.989         |
| 20            | 5.136        | 0.5              | 60-80                    | 35        | 3        | 0.0068                | 9.61                | 9.24                | 69.16        | 0.9798        |
| 20            | 5.136        | 0.5              | 80-100                   | 35        | 3        | 0.00421               | 14.85               | 14.26               | 66.12        | 0.976         |
| <b>20</b>     | <b>5.136</b> | <b>0.5</b>       | <b>&lt;100</b>           | <b>35</b> | <b>3</b> | <b>0.00419</b>        | <b>18.65</b>        | <b>18.3</b>         | <b>71.27</b> | <b>0.9897</b> |
| 20            | 5.136        | 0.5              | <100                     | 25        | 3        | 0.0042                | 18.05               | 17.6                | 74.49        | 0.9756        |
| <b>20</b>     | <b>5.136</b> | <b>0.5</b>       | <b>&lt;100</b>           | <b>35</b> | <b>3</b> | <b>0.00419</b>        | <b>18.65</b>        | <b>18.3</b>         | <b>71.27</b> | <b>0.9897</b> |
| 20            | 5.136        | 0.5              | <100                     | 45        | 3        | 0.00419               | 19.01               | 18.87               | 73.48        | 0.9885        |
| 20            | 5.136        | 0.5              | <100                     | 35        | 1        | 0.00384               | 17.88               | 17.45               | 67.94        | 0.9791        |
| 20            | 5.136        | 0.5              | <100                     | 35        | 2        | 0.0041                | 18.47               | 18.19               | 70.84        | 0.9916        |
| <b>20</b>     | <b>5.136</b> | <b>0.5</b>       | <b>&lt;100</b>           | <b>35</b> | <b>3</b> | <b>0.00419</b>        | <b>18.65</b>        | <b>18.3</b>         | <b>71.27</b> | <b>0.9897</b> |
| 20            | 5.136        | 0.5              | <100                     | 35        | 4        | 0.00423               | 16.74               | 16.42               | 69.51        | 0.9902        |
| 20            | 5.136        | 0.5              | <100                     | 35        | 5        | 0.00457               | 14.69               | 14.27               | 66.16        | 0.9779        |
| 20            | 5.136        | 0.5              | <100                     | 35        | 6        | 0.00442               | 12.77               | 12.37               | 63.38        | 0.9862        |
| 20            | 5.136        | 0.5              | <100                     | 35        | 7        | 0.0049                | 7.13                | 6.68                | 50.04        | 0.9456        |

Note: The subscripts 'exp' and 'calc' show the experimental and calculated values, respectively.

**Table S2.** Parameters of the Yoon-Nelson model using linear regression analysis for As(V) adsorption onto PC-Fe/C-B under different conditions.

| $C_0$     | Q            | Dosage<br>m | Particle<br>size | T         | pH       | $k_{YN}$          | $\tau_{theo}$ | $\tau_{exp}$ | $\Delta\tau/\tau_{exp}$ | $t_{1,theo}$ | $t_{1,exp}$ | $t_{2,theo}$ | $t_{2,exp}$ | $R^2$         |
|-----------|--------------|-------------|------------------|-----------|----------|-------------------|---------------|--------------|-------------------------|--------------|-------------|--------------|-------------|---------------|
| mg/<br>L  | mL/<br>min   | g           | mesh             | °C        |          | min <sup>-1</sup> | min           | min          | %                       | min          | min         | min          | min         |               |
| 10        | 5.136        | 0.5         | <100             | 35        | 3        | 0.0616            | 131           | 132          | 1.06                    | 83           | 94          | 166          | 163         | 0.9877        |
| <b>20</b> | <b>5.136</b> | <b>0.5</b>  | <b>&lt;100</b>   | <b>35</b> | <b>3</b> | <b>0.0838</b>     | <b>91</b>     | <b>90</b>    | <b>0.85</b>             | <b>47</b>    | <b>56</b>   | <b>117</b>   | <b>117</b>  | <b>0.9897</b> |
| 30        | 5.136        | 0.5         | <100             | 35        | 3        | 0.0919            | 66            | 65           | 1.22                    | 21           | 26          | 90           | 94          | 0.9587        |
| 20        | 4.28         | 0.5         | <100             | 35        | 3        | 0.0668            | 115           | 110          | 4.30                    | 60           | 66          | 148          | 152         | 0.9871        |
| <b>20</b> | <b>5.136</b> | <b>0.5</b>  | <b>&lt;100</b>   | <b>35</b> | <b>3</b> | <b>0.0838</b>     | <b>91</b>     | <b>90</b>    | <b>0.85</b>             | <b>47</b>    | <b>56</b>   | <b>117</b>   | <b>117</b>  | <b>0.9897</b> |
| 20        | 6.849        | 0.5         | <100             | 35        | 3        | 0.0917            | 79            | 75           | 5.16                    | 39           | 46          | 103          | 105         | 0.9779        |
| 20        | 8.561        | 0.5         | <100             | 35        | 3        | 0.0938            | 61            | 54           | 12.4                    | 22           | 26          | 84           | 88          | 0.9368        |
| 8         |              |             |                  |           |          |                   |               |              |                         |              |             |              |             |               |
| 20        | 5.136        | 0.3         | <100             | 35        | 3        | 0.1338            | 51            | 50           | 2.20                    | 24           | 26          | 68           | 67          | 0.9801        |
| 20        | 5.136        | 0.4         | <100             | 35        | 3        | 0.0987            | 80            | 79           | 1.26                    | 43           | 47          | 102          | 103         | 0.9920        |
| <b>20</b> | <b>5.136</b> | <b>0.5</b>  | <b>&lt;100</b>   | <b>35</b> | <b>3</b> | <b>0.0838</b>     | <b>91</b>     | <b>90</b>    | <b>0.85</b>             | <b>47</b>    | <b>56</b>   | <b>117</b>   | <b>117</b>  | <b>0.9897</b> |
| 20        | 5.136        | 0.6         | <100             | 35        | 3        | 0.0654            | 115           | 111          | 3.69                    | 59           | 66          | 149          | 151         | 0.9890        |
| 20        | 5.136        | 0.5         | 60-80            | 35        | 3        | 0.1360            | 47            | 44           | 6.33                    | 20           | 26          | 63           | 65          | 0.9798        |
| 20        | 5.136        | 0.5         | 80-100           | 35        | 3        | 0.0841            | 72            | 69           | 4.73                    | 29           | 32          | 98           | 103         | 0.9760        |
| <b>20</b> | <b>5.136</b> | <b>0.5</b>  | <b>&lt;100</b>   | <b>35</b> | <b>3</b> | <b>0.0838</b>     | <b>91</b>     | <b>90</b>    | <b>0.85</b>             | <b>47</b>    | <b>56</b>   | <b>117</b>   | <b>117</b>  | <b>0.9897</b> |
| 20        | 5.136        | 0.5         | <100             | 25        | 3        | 0.084             | 88            | 89           | 1.25                    | 44           | 52          | 114          | 115         | 0.9756        |
| <b>20</b> | <b>5.136</b> | <b>0.5</b>  | <b>&lt;100</b>   | <b>35</b> | <b>3</b> | <b>0.0838</b>     | <b>91</b>     | <b>90</b>    | <b>0.85</b>             | <b>47</b>    | <b>56</b>   | <b>117</b>   | <b>117</b>  | <b>0.9897</b> |
| 20        | 5.136        | 0.5         | <100             | 45        | 3        | 0.0838            | 93            | 92           | 0.59                    | 49           | 56          | 119          | 118         | 0.9885        |
| 20        | 5.136        | 0.5         | <100             | 35        | 1        | 0.0767            | 87            | 88           | 1.12                    | 39           | 47          | 116          | 116         | 0.9791        |
| 20        | 5.136        | 0.5         | <100             | 35        | 2        | 0.0819            | 90            | 91           | 1.20                    | 45           | 50          | 117          | 119         | 0.9916        |
| <b>20</b> | <b>5.136</b> | <b>0.5</b>  | <b>&lt;100</b>   | <b>35</b> | <b>3</b> | <b>0.0838</b>     | <b>91</b>     | <b>90</b>    | <b>0.85</b>             | <b>47</b>    | <b>56</b>   | <b>117</b>   | <b>117</b>  | <b>0.9897</b> |
| 20        | 5.136        | 0.5         | <100             | 35        | 4        | 0.0845            | 81            | 82           | 0.61                    | 38           | 43          | 107          | 109         | 0.9902        |
| 20        | 5.136        | 0.5         | <100             | 35        | 5        | 0.0913            | 72            | 74           | 3.37                    | 31           | 33          | 96           | 97          | 0.9779        |
| 20        | 5.136        | 0.5         | <100             | 35        | 6        | 0.0883            | 62            | 61           | 1.92                    | 21           | 26          | 87           | 90          | 0.9862        |
| 20        | 5.136        | 0.5         | <100             | 35        | 7        | 0.0979            | 35            | 31           | 12.0                    | -            | 6           | 57           | 60          | 0.9456        |
| 0         |              |             |                  |           |          |                   |               |              |                         |              |             |              |             |               |

Note: The subscripts 'exp' and 'calc' show the experimental and calculated values, respectively.

**Table S3.** Parameters of the Clark model using linear regression analysis for As(V) adsorption onto PC-Fe/C-B under different conditions.

| C <sub>0</sub><br>mg/L | Q<br>mL/min  | Dosage<br>m<br>g | Particle<br>size<br>mesh | T<br>°C   | pH       | r<br>mg/L·min | A<br>min        | R <sup>2</sup> |
|------------------------|--------------|------------------|--------------------------|-----------|----------|---------------|-----------------|----------------|
| 10                     | 5.136        | 0.5              | <100                     | 35        | 3        | 0.1781        | 3.46E+11        | 0.9786         |
| 20                     | <b>5.136</b> | <b>0.5</b>       | <b>&lt;100</b>           | <b>35</b> | <b>3</b> | <b>0.2214</b> | <b>2.42E+10</b> | <b>0.9538</b>  |
| 30                     | 5.136        | 0.5              | <100                     | 35        | 3        | 0.2435        | 2.97E+08        | 0.8689         |
| 20                     | 4.28         | 0.5              | <100                     | 35        | 3        | 0.1853        | 6.18E+10        | 0.9525         |
| 20                     | <b>5.136</b> | <b>0.5</b>       | <b>&lt;100</b>           | <b>35</b> | <b>3</b> | <b>0.2214</b> | <b>2.42E+10</b> | <b>0.9538</b>  |
| 20                     | 6.849        | 0.5              | <100                     | 35        | 3        | 0.2320        | 2.74E+09        | 0.9175         |
| 20                     | 8.561        | 0.5              | <100                     | 35        | 3        | 0.2358        | 7.29E+07        | 0.8230         |
| 20                     | 5.136        | 0.3              | <100                     | 35        | 3        | 0.3383        | 1.71E+09        | 0.9047         |
| 20                     | 5.136        | 0.4              | <100                     | 35        | 3        | 0.2662        | 6.60E+10        | 0.9654         |
| 20                     | <b>5.136</b> | <b>0.5</b>       | <b>&lt;100</b>           | <b>35</b> | <b>3</b> | <b>0.2214</b> | <b>2.42E+10</b> | <b>0.9538</b>  |
| 20                     | 5.136        | 0.6              | <100                     | 35        | 3        | 0.1803        | 3.74E+10        | 0.9623         |
| 20                     | 5.136        | 0.5              | 60-80                    | 35        | 3        | 0.3724        | 1.55E+09        | 0.9486         |
| 20                     | 5.136        | 0.5              | 80-100                   | 35        | 3        | 0.2215        | 3.18E+08        | 0.9041         |
| 20                     | <b>5.136</b> | <b>0.5</b>       | <b>&lt;100</b>           | <b>35</b> | <b>3</b> | <b>0.2214</b> | <b>2.42E+10</b> | <b>0.9538</b>  |
| 20                     | 5.136        | 0.5              | <100                     | 25        | 3        | 0.2592        | 4.09E+11        | 0.9344         |
| 20                     | <b>5.136</b> | <b>0.5</b>       | <b>&lt;100</b>           | <b>35</b> | <b>3</b> | <b>0.2214</b> | <b>2.42E+10</b> | <b>0.9538</b>  |
| 20                     | 5.136        | 0.5              | <100                     | 45        | 3        | 0.2875        | 7.94E+13        | 0.9712         |
| 20                     | 5.136        | 0.5              | <100                     | 35        | 1        | 0.1939        | 9.06E+08        | 0.9283         |
| 20                     | 5.136        | 0.5              | <100                     | 35        | 2        | 0.2139        | 9.88E+09        | 0.9527         |
| 20                     | <b>5.136</b> | <b>0.5</b>       | <b>&lt;100</b>           | <b>35</b> | <b>3</b> | <b>0.2214</b> | <b>2.42E+10</b> | <b>0.9538</b>  |
| 20                     | 5.136        | 0.5              | <100                     | 35        | 4        | 0.2274        | 4.54E+09        | 0.9424         |
| 20                     | 5.136        | 0.5              | <100                     | 35        | 5        | 0.2514        | 2.74E+09        | 0.9122         |
| 20                     | 5.136        | 0.5              | <100                     | 35        | 6        | 0.2303        | 6.79E+07        | 0.9237         |
| 20                     | 5.136        | 0.5              | <100                     | 35        | 7        | 0.2178        | 6.54E+04        | 0.8154         |

**Table S4.** Parameters of the Adams-Bohart and Wolborska model using linear regression analysis for As(V) adsorption onto PC-Fe/C-B under different conditions.

| $C_0$    | Q            | Dosage<br>m | Particle<br>size | T         | pH       | Height<br>of the<br>column<br>Z | Flow<br>rate<br>$U_0$ | Mass<br>transfer<br>coefficient<br>$k_{AB}$ | $N_0$        | $\beta_a$         | $R^2$         |
|----------|--------------|-------------|------------------|-----------|----------|---------------------------------|-----------------------|---------------------------------------------|--------------|-------------------|---------------|
| mg/<br>L | mL/<br>min   | g           | mesh             | °C        |          | cm                              | cm/min                | L/mg·min                                    | mg/L         | min <sup>-1</sup> |               |
| 10       | 5.136        | 0.5         | <100             | 35        | 3        | 1.23                            | 10.22                 | 0.004720                                    | 12.65        | 0.0597            | 0.9687        |
| 20       | <b>5.136</b> | <b>0.5</b>  | <b>&lt;100</b>   | <b>35</b> | <b>3</b> | <b>1.23</b>                     | <b>10.22</b>          | <b>0.002865</b>                             | <b>18.52</b> | <b>0.0531</b>     | <b>0.9307</b> |
| 30       | 5.136        | 0.5         | <100             | 35        | 3        | 1.23                            | 10.22                 | 0.002113                                    | 20.58        | 0.0435            | 0.8374        |
| 20       | 4.28         | 0.5         | <100             | 35        | 3        | 1.23                            | 8.51                  | 0.002435                                    | 19.02        | 0.0463            | 0.9346        |
| 20       | <b>5.136</b> | <b>0.5</b>  | <b>&lt;100</b>   | <b>35</b> | <b>3</b> | <b>1.23</b>                     | <b>10.22</b>          | <b>0.002865</b>                             | <b>18.52</b> | <b>0.0531</b>     | <b>0.9307</b> |
| 20       | 6.849        | 0.5         | <100             | 35        | 3        | 1.23                            | 13.63                 | 0.002995                                    | 21.34        | 0.0639            | 0.8891        |
| 20       | 8.561        | 0.5         | <100             | 35        | 3        | 1.23                            | 17.03                 | 0.003005                                    | 22.19        | 0.0667            | 0.7773        |
| 20       | 5.136        | 0.3         | <100             | 35        | 3        | 0.74                            | 10.22                 | 0.004305                                    | 18.14        | 0.0781            | 0.8666        |
| 20       | 5.136        | 0.4         | <100             | 35        | 3        | 0.98                            | 10.22                 | 0.003475                                    | 19.94        | 0.0693            | 0.9472        |
| 20       | <b>5.136</b> | <b>0.5</b>  | <b>&lt;100</b>   | <b>35</b> | <b>3</b> | <b>1.23</b>                     | <b>10.22</b>          | <b>0.002865</b>                             | <b>18.52</b> | <b>0.0531</b>     | <b>0.9307</b> |
| 20       | 5.136        | 0.6         | <100             | 35        | 3        | 1.48                            | 10.22                 | 0.002365                                    | 19.19        | 0.0454            | 6.5537        |
| 20       | 5.136        | 0.5         | 60-80            | 35        | 3        | 1.35                            | 10.22                 | 0.004880                                    | 8.86         | 0.0433            | 0.9308        |
| 20       | 5.136        | 0.5         | 80-100           | 35        | 3        | 1.29                            | 10.22                 | 0.002875                                    | 14.47        | 0.0416            | 0.8749        |
| 20       | <b>5.136</b> | <b>0.5</b>  | <b>&lt;100</b>   | <b>35</b> | <b>3</b> | <b>1.23</b>                     | <b>10.22</b>          | <b>0.002865</b>                             | <b>18.52</b> | <b>0.0531</b>     | <b>0.9307</b> |
| 20       | 5.136        | 0.5         | <100             | 25        | 3        | 1.23                            | 10.22                 | 0.003035                                    | 17.45        | 0.0530            | 0.9199        |
| 20       | <b>5.136</b> | <b>0.5</b>  | <b>&lt;100</b>   | <b>35</b> | <b>3</b> | <b>1.23</b>                     | <b>10.22</b>          | <b>0.002865</b>                             | <b>18.52</b> | <b>0.0531</b>     | <b>0.9307</b> |
| 20       | 5.136        | 0.5         | <100             | 45        | 3        | 1.23                            | 10.22                 | 0.002860                                    | 18.87        | 0.0540            | 0.9591        |
| 20       | 5.136        | 0.5         | <100             | 35        | 1        | 1.23                            | 10.22                 | 0.002480                                    | 18.35        | 0.0455            | 0.8964        |
| 20       | 5.136        | 0.5         | <100             | 35        | 2        | 1.23                            | 10.22                 | 0.002760                                    | 18.47        | 0.0510            | 0.9273        |
| 20       | <b>5.136</b> | <b>0.5</b>  | <b>&lt;100</b>   | <b>35</b> | <b>3</b> | <b>1.23</b>                     | <b>10.22</b>          | <b>0.002865</b>                             | <b>18.52</b> | <b>0.0531</b>     | <b>0.9307</b> |
| 20       | 5.136        | 0.5         | <100             | 35        | 4        | 1.23                            | 10.22                 | 0.002955                                    | 16.77        | 0.0496            | 0.9176        |
| 20       | 5.136        | 0.5         | <100             | 35        | 5        | 1.23                            | 10.22                 | 0.003285                                    | 14.82        | 0.0487            | 0.8044        |
| 20       | 5.136        | 0.5         | <100             | 35        | 6        | 1.23                            | 10.22                 | 0.002970                                    | 13.55        | 0.0402            | 0.8346        |
| 20       | 5.136        | 0.5         | <100             | 35        | 7        | 1.23                            | 10.22                 | 0.002660                                    | 9.16         | 0.0244            | 0.9331        |

**Table S5.** Comparison of the adsorption capacity of the PC-Fe/C-B and various adsorbents for As(V) removal from water.

| Sorbent                                             | pH          | Initial As(V)<br>concentration<br>(mg/L) | Surface<br>area<br>(m <sup>2</sup> /g) | Grain size | T (°C) | Capacity<br>(mg/g) | Ref.       |
|-----------------------------------------------------|-------------|------------------------------------------|----------------------------------------|------------|--------|--------------------|------------|
| PC-Fe/C-B                                           | 3           | 20                                       | 186.66                                 | < 0.149 mm | 35     | 12.37–21           | This study |
| Iron-coated<br>seaweeds                             | 7           | 25                                       |                                        |            | 20     | 7.3                | [1]        |
| Biochar-magnetite<br>composite                      | 7           | 10                                       | 320.1                                  | 300–500 µm | 25     | 5.49               | [2]        |
| Organo-modified<br>natural zeolitic<br>materials    | 7           | 10–500                                   |                                        |            |        | 6.7                | [3]        |
| Fe-sericite<br>composite beads                      |             | 50                                       | 13.51                                  |            |        | 5.78               | [4]        |
| Red mud-modified<br>biochar (RM-BC)                 | 6           | 10                                       | 186.95                                 |            |        | 5.923              | [5]        |
| PBGC-Fe/C                                           | 3           | 50                                       | 59.2                                   | < 0.149 mm | 35     | 4.83               | [6]        |
| Aluminum Mining<br>By-product<br>(AMB)              | 5.5–<br>6.5 | 50                                       |                                        | 1 mm       |        | 4.51               | [7]        |
| CCHA<br>nanocomposite                               | 7           | 1–50                                     |                                        |            | 45     | 12.72              | [8]        |
| Zeo-NaY-S                                           | 6           | 20                                       | 506.6                                  | 21.70 µm   |        | 2.8                | [9]        |
| Bismuth<br>impregnated<br>biochar (BiBC500)         | 9.3         | 50                                       | 190.4                                  | 0.5–1 µm   |        | 16.21              | [10]       |
| Magnetic<br>nanocomposite<br>(FeMWCNTs)             |             | 10                                       |                                        | 60–100 nm  |        | 250                | [11]       |
| Mesoporous<br>sulphated zirconia<br>(MSZ)           | 6.6         | 44.7                                     | 141                                    |            |        | 99.23              | [12]       |
| Potassium ferrate                                   | 6.5         | 2                                        | 250–600                                | 1.5–3.0 nm |        | 162.02             | [13]       |
| Mixed oxide (MO)                                    | 8           | 50                                       | 198 ± 2                                |            |        | 20.7–12.9          | [14]       |
| Modified red mud                                    | 6.8         | 50                                       | 68.5                                   |            | 25     | 43.25              | [15]       |
| Zr(IV)-loaded SOW<br>gel                            | 3           | 15                                       |                                        | 75–150 µm  | 30     | 36.27              | [16]       |
| Synthetic zeolites<br>H90                           | 3.2         | 100                                      | 400                                    |            |        | 34.8               | [17]       |
| Polystyrene-Fe <sub>3</sub> O <sub>4</sub>          | 6           | 13                                       |                                        |            |        | 139.3              | [18]       |
| Magnetite<br>nanoparticles                          | 8           | 0.1                                      | 60                                     | 19.3 nm    |        | 0.485              | [19]       |
| Hematite<br>nanoparticles                           | 7.8         | 0.2                                      | 50                                     |            |        | 4.122              | [20]       |
| Fe <sub>3</sub> O <sub>4</sub> /RGO/Cu-ZEA          |             | 0.1                                      | 61.55                                  |            |        | 50                 | [21]       |
| Mg–Fe-based<br>hydrotalcites<br>(FeHT)              | 9           | 2                                        | 1.448                                  |            | 25     | 0.103              | [22]       |
| Iron oxide amended<br>rice husk char 950<br>IOA-RHC | 6.85        | 0.1–2.5                                  | 308                                    |            |        | 1.46 ±<br>0.11     | [23]       |
| Fe(III)-modified<br>montmorillonite                 | 6           | 0.4                                      | 20.7                                   |            | 25     | 3.9                | [24]       |

|                                                        |         |           |          |              |        |           |      |
|--------------------------------------------------------|---------|-----------|----------|--------------|--------|-----------|------|
| goethite-P(AAm) composite                              | 7.2–7.7 | 0.3       | 5        |              | 25     | 1.22      | [25] |
| Fe <sub>3</sub> O <sub>4</sub> @CTAB                   | 6       | 1         |          | 10 nm        |        | 23.07     | [26] |
| Chinese red soil                                       | 6       | 0.15      | 50.4     |              | 25     | 0.936     | [27] |
| Carbonized yeast cells containing silver nanoparticles |         | 2.5       |          | 19.9 nm      |        | 1.14      | [28] |
| Magnetic nanoparticles synthesized from waste red mud  | 2       | 0.05      |          | 6–14 nm      | 25     | 0.4       | [29] |
| 3D graphene macroscopic gel                            | 4       | 0.93      | 13.22    |              | 30     | 0.24      | [30] |
| Blast-furnace-slag geopolymer (BFS-GP)                 | 7–8     | 2.4       | 64.5     | 5.93 μm      |        | 0.52      | [31] |
| Aluminum modified crop straw-derived biochars          | 5       | 0.02–0.09 | 1.0–19.3 |              | 25     | 34.7–52.0 | [32] |
| Bagasse fly ash                                        | 7       | 0.05      | 450      | 100–250 μm   | 25     | 0.0155    | [33] |
| Granular TiO <sub>2</sub>                              | 8.2     | 0.8       | 196      | 0.18~0.25 mm |        | 38.3      | [34] |
| Iron oxide-based adsorbent μGFH                        | 8       | 0.38      | 283 ± 3  | < 5 μm       | 20 ± 2 | 22.4      | [35] |
| Iron oxide-based adsorbent μTMF                        | 8       | 0.38      | 178 ± 8  | < 5 μm       | 20 ± 2 | 15.4      | [35] |

**Table S6.** Input files for the As(V) aqueous phase speciation in the simulation using PHREEQC.

| SOLUTION_SPECIES       | #As(V) speciation - log_k from phreeqc.dat |
|------------------------|--------------------------------------------|
| H3AsO4 = AsO4-3 + 3H+  |                                            |
| log_k                  | -20.7                                      |
| H+ + AsO4-3 = HAsO4-2  |                                            |
| log_k                  | 11.50                                      |
| 2H+ + AsO4-3 = H2AsO4- |                                            |
| log_k                  | 18.46                                      |

**Table S7.** PHREEQC input files for the surface acid-base behavior of PC-Fe/C-B in aqueous As(V) solution.

SURFACE\_MASTER\_SPECIES

Surf\_iron Surf\_ironOH

SURFACE\_SPECIES

# Dixit and Hering. Environ Sci Technol 37 (2003) 4182 [36]

Surf\_ironOH = Surf\_ironOH

log\_k 0

Surf\_ironOH = Surf\_ironO- + H+

log\_k -8.93

Surf\_ironOH + H+ = Surf\_ironOH2+

log\_k 7.29

# Stachowicz et al. J Colloid & Interface Sci 302(2006)62 [37]

2Surf\_ironOH + 2H+ + AsO4-3 = Surf\_iron2O2AsO2-1 + 2H2O

log\_k 29.29

2Surf\_ironOH + 3H+ + AsO4-3 = Surf\_iron2O2AsOOH + 2H2O

log\_k 32.69

1Surf\_ironOH + 2H+ + AsO4-3 = Surf\_ironOAsO2OH-1 + H2O

log\_k 26.62



**Table S8.** An input file example of the CD-MUSIC model for surface complexation in the simulation using PHREEQC.

```

SURFACE 1 CD_MUSIC surface with Donnan layer

-equilibrate with solution 1

-sites_units density

-cd_music

Surf_ironOH    2.50 186.66    0.50

    # Name of a surface binding site

    # Total number of surface binding site (site/nm2)

    # Surface area (m2/g)

    # Mass of adsorbent (g)

-capacitances    0.85 0.75

    # c1—Capacitance for the 0-1 plane in the CD-MUSIC formulation, F/m2.
    Stachowicz (2006) [37]

    # c2—Capacitance for the 1-2 plane in the CD-MUSIC formulation, F/m2.
    Hiemstra(2006) [38]

-Donnan    1e-8

    # Thickness of the diffuse layer in meters. Default is 10-8 m.

-only_counter_ions    true

    # True indicates that the surface charge will be balanced

    # by a surplus of counter-ions in the diffuse layer.

```

**Table S9.** An input file example for the influent TRANSPORT in the simulation using PHREEQC.

```
TRANSPORT

-cells 10                #Number of cells in a 1D column with 0.5 g adsorbent
-lengths 0.00123         #Length (m) of each cell with 0.05 g adsorbent
-time_step 2.54          #Time (s) of each shift for Q = 5.136 mL/min
-shifts 11000            #Number of shifts periods in simulation
-flow_direction forward
-boundary_conditions flux flux
-diffusion_coefficient 0
-dispersivities 0.02
-correct_disp true
-punch_cells 10
-punch_frequency 1
-print_cells 10
-print_frequency 20
```

## References

1. Vieira, B.R.; Pintor, A.M.; Boaventura, R.A.; Botelho, C.M.; Santos, S.C. Arsenic removal from water using iron-coated seaweeds. *J. Environ. Manage.* **2017**, *192*, 224-233.
2. Navarathna, C.M.; Karunanayake, A.G.; Gunatilake, S.R.; Pittman Jr, C.U.; Perez, F.; Mohan, D.; Mlsna, T. Removal of Arsenic (III) from water using magnetite precipitated onto Douglas fir biochar. *J. Environ. Manage.* **2019**, *250*, 109429.
3. Misaelides, P.; Nikashina, V.; Godelitsas, A.; Gembitskii, P.; Kats, E. Sorption of As (V)-anions from aqueous solutions by organo-modified natural zeolitic materials. *J. Radioanal. Nucl. Chem.* **1998**, *227*, 183-186.
4. Lee, C.; Jung, J.; Pawar, R.R.; Kim, M.; Lee, S.M. Arsenate and phosphate removal from water using Fe-sericite composite beads in batch and fixed-bed systems. *J. Ind. Eng. Chem.* **2017**, *47*, 375-383.
5. Wu, C.; Huang, L.; Xue, S.; Huang, Y.; Hartley, W.; Cui, M.; Wong, M. Arsenic sorption by red mud-modified biochar produced from rice straw. *Environ. Sci. Pollut. Res.* **2017**, *24*, 18168-18178.
6. Zhu, Y.; Zhu, Z.; Chen, Y.; Yang, F.; Hui, Q. Kinetics and thermodynamics of sorption for As(V) on the porous biomorph-genetic composite of  $\alpha$ -Fe<sub>2</sub>O<sub>3</sub>/Fe<sub>3</sub>O<sub>4</sub>/C with eucalyptus wood hierarchical microstructure. *Water Air Soil Pollut.* **2013**, *224*, 1589.
7. Costa, E.; Guilherme, L.; Lopes, G.; Lima, J.; Curi, N. Competitive sorption of arsenate and phosphate on aluminum mining by-product. *Water Air Soil Pollut.* **2012**, *223*, 5433-5444.
8. Islam, M.; Mishra, P.C.; Patel, R. Arsenate removal from aqueous solution by cellulose-carbonated hydroxyapatite nanocomposites. *J. Hazard. Mater.* **2011**, *189*, 755-763.
9. Yusof, A.M.; Malek, N.A.N.N. Removal of Cr (VI) and As (V) from aqueous solutions by HDTMA-modified zeolite Y. *J. Hazard. Mater.* **2009**, *162*, 1019-1024.
10. Zhu, N.; Yan, T.; Qiao, J.; Cao, H. Adsorption of arsenic, phosphorus and chromium by bismuth impregnated biochar: Adsorption mechanism and depleted adsorbent utilization. *Chemosphere* **2016**, *164*, 32-40.
11. Alijani, H.; Shariatnia, Z. Effective aqueous arsenic removal using zero valent iron doped MWCNT synthesized by *in situ* CVD method using natural  $\alpha$ -Fe<sub>2</sub>O<sub>3</sub> as a precursor. *Chemosphere* **2017**, *171*, 502-511.
12. Han, L.; Sun, H.; Ro, K.S.; Sun, K.; Libra, J.A.; Xing, B. Removal of antimony (III) and cadmium (II) from aqueous solution using animal manure-derived hydrochars and pyrochars. *Bioresour. Technol.* **2017**, *234*, 77-85.
13. Lan, B.; Wang, Y.; Wang, X.; Zhou, X.; Kang, Y.; Li, L. Aqueous arsenic (As) and antimony (Sb) removal by potassium ferrate. *Chem. Eng. J.* **2016**, *292*, 389-397.
14. Mahmood, T.; Din, S.; Naeem, A.; Mustafa, S.; Waseem, M.; Hamayun, M. Adsorption of arsenate from aqueous solution on binary mixed oxide of iron and silicon. *Chem. Eng. J.* **2012**, *192*, 90-98.
15. Zhang, S.; Liu, C.; Luan, Z.; Peng, X.; Ren, H.; Wang, J. Arsenate removal from aqueous solutions using modified red mud. *J. Hazard. Mater.* **2008**, *152*, 486-492.
16. Biswas, B.K.; Inoue, J.; Kawakita, H.; Ohto, K.; Inoue, K. Effective removal and recovery of antimony using metal-loaded saponified orange waste. *J. Hazard. Mater.* **2009**, *172*, 721-728.
17. Chutia, P.; Kato, S.; Kojima, T.; Satokawa, S. Adsorption of As (V) on surfactant-modified natural zeolites. *J. Hazard. Mater.* **2009**, *162*, 204-211.
18. Jiang, W.; Chen, X.; Niu, Y.; Pan, B. Spherical polystyrene-supported nano-Fe<sub>3</sub>O<sub>4</sub> of high capacity and low-field separation for arsenate removal from water. *J. Hazard. Mater.* **2012**, *243*, 319-325.

19. Shipley, H.J.; Yean, S.; Kan, A.T.; Tomson, M.B. A sorption kinetics model for arsenic adsorption to magnetite nanoparticles. *Environ. Sci. Pollut. Res.* **2010**, *17*, 1053-1062.
20. Dickson, D.; Liu, G.; Cai, Y. Adsorption kinetics and isotherms of arsenite and arsenate on hematite nanoparticles and aggregates. *J. Environ. Manage.* **2017**, *186*, 261-267.
21. Khatamian, M.; Khodakarampoor, N.; Saket-Oskoui, M. Efficient removal of arsenic using graphene-zeolite based composites. *J. Colloid Interface Sci.* **2017**, *498*, 433-441.
22. Türk, T.; Alp, İ.; Deveci, H. Adsorption of As (V) from water using Mg-Fe-based hydrotalcite (FeHT). *J. Hazard. Mater.* **2009**, *171*, 665-670.
23. Cope, C.O.; Webster, D.S.; Sabatini, D.A. Arsenate adsorption onto iron oxide amended rice husk char. *Sci. Total Environ.* **2014**, *488*, 554-561.
24. Luengo, C.V.; Volpe, M.A.; Avena, M.J. High sorption of phosphate on Mg-Al layered double hydroxides: Kinetics and equilibrium. *J. Environ. Chem. Eng.* **2017**, *5*, 4656-4662.
25. Ramirez-Muñiz, K.; Perez-Rodriguez, F.; Rangel-Mendez, R. Adsorption of arsenic onto an environmental friendly goethite-polyacrylamide composite. *J. Mol. Liq.* **2018**, *264*, 253-260.
26. Jin, Y.; Liu, F.; Tong, M.; Hou, Y. Removal of arsenate by cetyltrimethylammonium bromide modified magnetic nanoparticles. *J. Hazard. Mater.* **2012**, *227*, 461-468.
27. Luo, L.; Zhang, S.; Shan, X.; Zhu, Y. Effects of oxalate and humic acid on arsenate sorption by and desorption from a Chinese red soil. *Water Air Soil Pollut.* **2006**, *176*, 269-283.
28. Selvakumar, R.; Jothi, N.A.; Jayavignesh, V.; Karthikaiselvi, K.; Antony, G.I.; Sharmila, P.; Kavitha, S.; Swaminathan, K. As (V) removal using carbonized yeast cells containing silver nanoparticles. *Water Res.* **2011**, *45*, 583-592.
29. Akin, I.; Arslan, G.; Tor, A.; Ersoz, M.; Cengeloglu, Y. Arsenic (V) removal from underground water by magnetic nanoparticles synthesized from waste red mud. *J. Hazard. Mater.* **2012**, *235*, 62-68.
30. Guo, L.; Ye, P.; Wang, J.; Fu, F.; Wu, Z. Three-dimensional Fe<sub>3</sub>O<sub>4</sub>-graphene macroscopic composites for arsenic and arsenate removal. *J. Hazard. Mater.* **2015**, *298*, 28-35.
31. Luukkonen, T.; Runtti, H.; Niskanen, M.; Tolonen, E.-T.; Sarkkinen, M.; Kemppainen, K.; Rämö, J.; Lassi, U. Simultaneous removal of Ni (II), As (III), and Sb (III) from spiked mine effluent with metakaolin and blast-furnace-slag geopolymers. *J. Environ. Manage.* **2016**, *166*, 579-588.
32. Qian, W.; Zhao, A.; Xu, R. Sorption of As (V) by aluminum-modified crop straw-derived biochars. *Water Air Soil Pollut.* **2013**, *224*, 1610.
33. Ali, I.; Al-Othman, Z.A.; Alwarthan, A.; Asim, M.; Khan, T.A. Removal of arsenic species from water by batch and column operations on bagasse fly ash. *Environ. Sci. Pollut. Res.* **2014**, *21*, 3218-3229.
34. Cui, J.; Du, J.; Yu, S.; Jing, C.; Chan, T. Groundwater arsenic removal using granular TiO<sub>2</sub>: integrated laboratory and field study. *Environ. Sci. Pollut. Res.* **2015**, *22*, 8224-8234.
35. Usman, M.; Belkasmi, A.I.; Kastoyiannis, I.A.; Ernst, M. Pre-deposited dynamic membrane adsorber formed of microscale conventional iron oxide-based adsorbents to remove arsenic from water: application study and mathematical modeling. *J. Chem. Technol. Biotechnol.* **2021**, *96*, 1504-1514.
36. Dixit, S.; Hering, J.G. Comparison of arsenic (V) and arsenic (III) sorption onto iron oxide minerals: implications for arsenic mobility. *Environ. Sci. Technol.* **2003**, *37*, 4182-4189.
37. Stachowicz, M.; Hiemstra, T.; van Riemsdijk, W.H. Surface speciation of As(III) and As(V) in relation to charge distribution. *J. Colloid Interface Sci.* **2006**, *302*, 62-75.
38. Hiemstra, T.; Van Riemsdijk, W.H. On the relationship between charge distribution, surface hydration, and the structure of the interface of metal hydroxides. *J. Colloid Interface Sci.* **2006**, *301*, 1-18.
